# Supplementary material for: Glia actively sculpt sensory neurons by controlled phagocytosis to tune animal behavior
Source: eLife. 2021 Mar 24;10:e63532. doi: 10.7554/eLife.63532 (PMC8079151; doi:10.7554/eLife.63532)
Supplement: Figure 1—source data 1. [file elife-63532-fig1-data1.xlsx]

## Sheet: Figure 1
Figure 1H
Genetic ablations	% animals with ipsilateral puncta	% animals with contralateral puncta	N
AFD present	100	100	130
AFD absent	0	100	21
Figure 1I
Laser ablations	% animals with ipsilateral puncta	% animals with contralateral puncta	N
Mock ablation	100	100	58
AFD abation	0	100	24
