# Supplementary material for: Glia actively sculpt sensory neurons by controlled phagocytosis to tune animal behavior
Source: eLife. 2021 Mar 24;10:e63532. doi: 10.7554/eLife.63532 (PMC8079151; doi:10.7554/eLife.63532)
Supplement: Figure 2—source data 1. — Raw data for Figure 2A–E. NRE: neuron-receptive ending. [file elife-63532-fig2-data1.xlsx]

## Sheet: Figure 2
Figure 2A
Fragment	Diameter (µm)
Puncta 1	0.67
Puncta 2	0.42
Puncta 3	0.32
Puncta 4	0.38
Puncta 5	0.43
Puncta 6	0.51
Puncta 7	0.49
Puncta 8	0.82
Puncta 9	0.47
Puncta 10	0.66
Puncta 11	0.55
Puncta 12	0.65
Puncta 13	0.42
Puncta 14	0.33
Puncta 15	0.7
Puncta 16	0.46
Puncta 17	0.45
Puncta 18	0.76
Puncta 19	0.5
Puncta 20	0.55
Puncta 21	0.58
Puncta 22	0.79
Average (µm)	0.541364
STDEV (µm)	0.145317
SE	0.0309817
Figure 2B
Diameter EM slice ID	Worm N2-2013 Section 200	Worm N2 Section 214	SR6336_1H_A3S17_5000x_028
Microvillum 1	194	184.42	284
Microvillum 2	244.73	220.56	219
Microvillum 3	201.77	190.8	232
Microvillum 4	176.86	284.14	170
Microvillum 5	212.91	248.19	168
Microvillum 6			188
Avg diameter (µm)	215.838
Avg Dev (µm)	26.8536
Distance	Slice Time (s)	Velocity (µm/s)	Avg. velocity	SE	Avg events/minute	SE
28.387	20	0.473117	1.04982	0.10801	0.816887	0.295867
24.16	20	0.402667
27.509	20	0.687725
45.913	20	1.14782
62.615	20	1.04358
32.059	20	1.60295
52.044	20	1.3011
32.878	20	0.82195
65.6	20	1.09333
40.2	10	2.01
23.751	10	1.18755
27.781	10	0.926033
27.108	10	1.3554
26.565	10	0.8855
24.257	10	0.808567
Figure 2C
Genotype Score	% animals with 10+ Puncta	% animals with 1-9 Puncta	% animals with 0 Puncta	N
Day 3	84.6154	12.8205	2.5641	39
Day 1	64.3275	31.5789	4.09357	171
L4	16.2791	72.093	11.6279	43
L1	0	29.1667	70.8333	24
Embryo	0	2.63158	97.3684	38
Figure 2D
Age Score	N (animals)	Avg Puncta	SE		Raw data (puncta/AMsh glia/animal)	Animal 1	Animal 2	Animal 3	Animal 4	Animal 5	Animal 6	Animal 7	Animal 8	Animal 9	Animal 10	Animal 11	Animal 12	Animal 13	Animal 14	Animal 15	Animal 16	Animal 17	Animal 18	Animal 19	Animal 20	Animal 21	Animal 22	Animal 23	Animal 24	Animal 25	Animal 26	Animal 27	Animal 28	Animal 29	Animal 30	Animal 31	Animal 32	Animal 33	Animal 34	Animal 35	Animal 36	Animal 37	Animal 38	Animal 39	Animal 40	Animal 41	Animal 42	Animal 43	Animal 44
Day 1	78	14.1923	0.95835			23	16	10	9	16	17	7	4	9	15	4	14	8	35	13	13	29	13	27	11	10	10	9	6	29	21	10	17	13	12	24	25	5	10	4	12	14	24	10	13	33	20	15	34
Day 3	17	29.2353	2.73798			22	37	44	22	29	11	49	35	25	26	25	43	42	20	35	12	20
L1	15	0.533333	0.191899			0	2	0	0	0	0	0	0	0	1	2	1	1	0	1
L3	10	1.6	0.476095			2	0	0	4	2	4	1	2	0	1
L4	19	8.57895	1.2573			2	6	22	3	14	5	8	9	13	11	9	9	4	3	20	4	7	7	7
Figure 2E
Temperature Score	N (animals)	Avg Puncta	SE		Raw data (puncta/AMsh glia/animal)	Animal 1	Animal 2	Animal 3	Animal 4	Animal 5	Animal 6	Animal 7	Animal 8	Animal 9	Animal 10	Animal 11	Animal 12	Animal 13	Animal 14	Animal 15	Animal 16	Animal 17	Animal 18	Animal 19	Animal 20	Animal 21	Animal 22	Animal 23	Animal 24	Animal 25	Animal 26	Animal 27	Animal 28	Animal 29	Animal 30	Animal 31	Animal 32	Animal 33	Animal 34	Animal 35	Animal 36	Animal 37	Animal 38	Animal 39	Animal 40	Animal 41	Animal 42	Animal 43	Animal 44
15	8	6	1.86126			2	4	2	15	8	5	0	12
20	78	14.1923	0.95835			23	16	10	9	16	17	7	4	9	15	4	14	8	35	13	13	29	13	27	11	10	10	9	6	29	21	10	17	13	12	24	25	5	10	4	12	14	24	10	13	33	20	15	34
25	16	27.5625	3.3103			3	4	52	40	25	22	18	28	36	30	34	39	13	32	27	38
[truncated: 34 more columns]
