# Supplementary material for: Glia actively sculpt sensory neurons by controlled phagocytosis to tune animal behavior
Source: eLife. 2021 Mar 24;10:e63532. doi: 10.7554/eLife.63532 (PMC8079151; doi:10.7554/eLife.63532)
Supplement: Figure 3—source data 1. — Raw data for Figure 3A, D, E. NRE: neuron-receptive ending. [file elife-63532-fig3-data1.xlsx]

## Sheet: Figure 3
Figure 3A
Genotype Score	% animals with puncta	N (animals)
gcy-8 fosmid:GFP	100	52
gcy-18 fosmid:GFP	100	101
gcy-23 fosmid:GFP	96	56
PSRTX-1b:SRTX-1:GFP	52	23
PSRTX-1b:DYF-11:GFP	0	20
Figure 3D
Genotype Score	% animals with 10+ Puncta	% animals with 1-9 Puncta	% animals with 0 Puncta	N (animals)
WT	65.7895	30.5263	3.68421	171
ttx-1(p767)	0	9.80392	90.1961	51
dyf-11(mn392)	95.082	4.91803	0	61
osm-6(p811)	100	0	0	82
Figure 3E
Genotype Score	N (animals)	Avg	SE		Raw data (puncta/AMsh glia/animal)	Animal 1	Animal 2	Animal 3	Animal 4	Animal 5	Animal 6	Animal 7	Animal 8	Animal 9	Animal 10	Animal 11	Animal 12	Animal 13	Animal 14	Animal 15	Animal 16	Animal 17	Animal 18	Animal 19	Animal 20	Animal 21	Animal 22	Animal 23	Animal 24	Animal 25	Animal 26	Animal 27	Animal 28	Animal 29	Animal 30	Animal 31	Animal 32	Animal 33	Animal 34	Animal 35	Animal 36	Animal 37	Animal 38	Animal 39	Animal 40	Animal 41	Animal 42	Animal 43	Animal 44
WT	78	14.1923	0.95835			23	16	10	9	16	17	7	4	9	15	4	14	8	35	13	13	29	13	27	11	10	10	9	6	29	21	10	17	13	12	24	25	5	10	4	12	14	24	10	13	33	20	15	34
dyf-11(mn392)	27	38.5926	3.63399			52	23	31	35	52	33	53	28	48	10	27	52	23	31	35	52	33	53	28	48	10	27	87	77	25	11	58
ttx-1(p767)	7	0.142857	0.142857			0	0	0	1	0	0	0
[truncated: 34 more columns]
