# Supplementary material for: Glia actively sculpt sensory neurons by controlled phagocytosis to tune animal behavior
Source: eLife. 2021 Mar 24;10:e63532. doi: 10.7554/eLife.63532 (PMC8079151; doi:10.7554/eLife.63532)
Supplement: Figure 4—source data 1. — Raw data for Figure 4B, C, D, E, G and Figure 4—figure supplement 1A–C. NRE: neuron-receptive ending. [file elife-63532-fig4-data1.xlsx]

## Sheet: Figure 4
Figure 4B
Genotype Score	% animals with 10+ Puncta	% animals with 1-9 Puncta	% animals with 0 Puncta	N (animals)
WT	64.3275	31.5789	4.09357	171
tat-1(tm3110)	86.1539	12.3077	1.53846	65
tat-1(tm1034)	86.8852	11.4754	1.63934	61
PAFD:TAT-1;tat-1	30.0885	67.2566	2.65487	113
scrm-1	53.9682	36.5079	9.52381	63
ced-8	64.2857	35.7143	0	42
Figure 4C
Genotype Score	% animals with 10+ Puncta	% animals with 1-9 Puncta	% animals with 0 Puncta	N (animals)
WT	64.3275	31.5789	4.09357	171
ced-1(e1754)	98.5294	1.47059	0	68
ced-1(e1735)	75	25	0	76
ced-7	89.6907	10.3093	0	97
ced-6	90.566	9.43396	0	53
Figure 4D
Genotype Score	% animals with 10+ Puncta	% animals with 1-9 Puncta	% animals with 0 Puncta	N (animals)
WT	71.9512	28.0488	0	75
psr-1	28.4768	62.9139	8.60927	151
psr-1;PAMsh:PSR-1	47.1014	45.6522	7.24638	138
tat-1	86.1539	12.3077	1.53846	61
tat-1;psr-1	18.2927	71.9512	9.7561	82
ttr-52	38.3562	54.7945	6.84931	146
ttr-52;psr-1	45.6522	54.3478	0	92
Figure 4E
Genotype Score	N (animals)	Avg	SE		Raw data (puncta/AMsh glia/animal)	Animal 1	Animal 2	Animal 3	Animal 4	Animal 5	Animal 6	Animal 7	Animal 8	Animal 9	Animal 10	Animal 11	Animal 12	Animal 13	Animal 14	Animal 15	Animal 16	Animal 17	Animal 18	Animal 19	Animal 20	Animal 21	Animal 22	Animal 23	Animal 24	Animal 25	Animal 26	Animal 27	Animal 28	Animal 29	Animal 30	Animal 31	Animal 32	Animal 33	Animal 34	Animal 35	Animal 36	Animal 37	Animal 38	Animal 39	Animal 40	Animal 41	Animal 42	Animal 43	Animal 44
WT	78	14.1923	0.95835			23	16	10	9	16	17	7	4	9	15	4	14	8	35	13	13	29	13	27	11	10	10	9	6	29	21	10	17	13	12	24	25	5	10	4	12	14	24	10	13	33	20	15	34
tat-1(tm1034)	19	41.6316	4.56673			18	50	47	66	39	38	37	38	26	14	67	13	26	38	58	47	41	34	94
psr-1(tm469)	28	7.39286	0.770383			0	11	5	9	1	14	6	6	8	5	13	6	2	7	9	14	3	10	7	2	3	11	9	8	4	10	9	15
Figure 4G
Genotype Score	RNAi	% animals with 10+ Puncta	% animals with 1-9 Puncta	% animals with 0 Puncta	N (animals)
WT	empty vector	44.7917	49.4792	5.72917	192
WT	pat-2	24.8756	65.1741	9.95025	201
psr-1(tm469)	empty vector	10.4	67.2	22.4	125
psr-1(tm469)	pat-2	2.38095	66.6667	30.9524	126
Figure 4 - supplement 1A
Genotype Score	% animals with AMsh puncta	N
WT	100	52
ver-1(ok1738)	100	73
ver-2(ok897)	100	84
ver-3(ok891)	98	44
ver-4(ok1079)	95	59
egl-15 (n484)	100	41
ina-1 (gm144)	100	44
unc-73(e936)	99	74
Figure 4 - supplement 1B
Genotype Score	RNAi	% animals with 10+ Puncta	% animals with 1-9 Puncta	% animals with 0 Puncta	N (animals)
WT	empty vector	44.7917	49.4792	5.72917	192
WT	pat-2	24.8756	65.1741	9.95025	201
psr-1(tm469)	empty vector	10.4	67.2	22.4	125
psr-1(tm469)	pat-2	2.38095	66.6667	30.9524	126
ced-1(e1754)	empty vector	92.3077	7.69231	0	82
ced-1(e1754)	pat-2	100	0	0	67
psr-1(tm469);ced-1(e1754)	empty vector	48	44	8	75
psr-1(tm469);ced-1(e1754)	pat-2	32.0988	64.1975	3.7037	81
Figure 4 - supplement 1C
Genotype Score	% animals with 10+ Puncta	% animals with 1-9 Puncta	% animals with 0 Puncta	N (animals)
WT	73.3333	26.6667	0	75
psr-1(tm469)	28.4768	62.9139	8.60927	151
ttr-52(tm2078)	38.3562	54.7945	6.84931	146
ttr-52(tm2078);psr-1(tm469)	45.6522	54.3478	0	92
ced-1(e1754)	98.5294	1.47059	0	68
psr-1(tm469);ced-1(e1754)	24.6575	42.4657	32.8767	73
ttr-52(tm2078);ced-1(e1754)	100	0	0	73
ttr-52(tm2078);ced-1(e1754);psr-1(tm469)	100	0	0	33
[truncated: 34 more columns]
