# Supplementary material for: Glia actively sculpt sensory neurons by controlled phagocytosis to tune animal behavior
Source: eLife. 2021 Mar 24;10:e63532. doi: 10.7554/eLife.63532 (PMC8079151; doi:10.7554/eLife.63532)
Supplement: Figure 5—source data 1. — Raw data for Figure 5A, B, D, E and Figure 5—figure supplement 1A–C. [file elife-63532-fig5-data1.xlsx]

## Sheet: Figure 5
Figure 5A
Genotype Score	% animals with 10+ Puncta	% animals with 1-9 Puncta	% animals with 0 Puncta	N (animals)
WT	64.3275	31.5789	4.09357	171
ced-12(n3261)	22.9167	56.25	20.8333	48
ced-12(k149)	8.19672	68.8525	22.9508	61
ced-12(k149);PAMsh:CED-12	64.3772	29.0639	6.55891	150
ced-2(e1752)	40.8163	57.1429	2.04082	49
ced-5(n1812)	4.16667	58.3333	37.5	48
Figure 5B
Genotype Score	N	Avg	SE		Raw data (puncta/AMsh glia/animal)	Animal 1	Animal 2	Animal 3	Animal 4	Animal 5	Animal 6	Animal 7	Animal 8	Animal 9	Animal 10	Animal 11	Animal 12	Animal 13	Animal 14	Animal 15	Animal 16	Animal 17	Animal 18	Animal 19	Animal 20	Animal 21	Animal 22	Animal 23	Animal 24	Animal 25	Animal 26	Animal 27	Animal 28	Animal 29	Animal 30	Animal 31	Animal 32	Animal 33	Animal 34	Animal 35	Animal 36	Animal 37	Animal 38	Animal 39	Animal 40	Animal 41	Animal 42	Animal 43	Animal 44
WT	78	14.1923	0.95835			23	16	10	9	16	17	7	4	9	15	4	14	8	35	13	13	29	13	27	11	10	10	9	6	29	21	10	17	13	12	24	25	5	10	4	12	14	24	10	13	33	20	15	34
ced-10(n3246)	39	3.07692	0.789937			3	6	2	0	1	3	0	1	18	4	4	1	12	3	21	14	3	1	5	0	0	0	0	0	3	4	1	2	0	2	1	0	1	0	4	0	0	0	0
ced-10(n1993)	24	2.375	0.625			3	0	4	10	0	0	2	2	3	4	1	0	0	0	0	0	4	2	4	1	1	12	1	3
ced-10(n1993);pAMsh:CED-10	14	104.714	7.80492			141	97	95	111	84	138	153	109	88	135	47	88	75	105
Figure 5D
Genotype Score	% animals with 10+ Puncta	% animals with 1-9 Puncta	% animals with 0 Puncta	N (animals)
WT	64.3275	31.5789	4.09357	171
ced-10(n3246)	0.806452	49.1936	50	124
ced-10(n1993)	2.77778	52.7778	44.4444	72
ced-10;PAMsh:CED-10	100	0	0	87
PAMsh:CED-10	90	10	0	50
PAMsh:CED-10(T17N)	4.28571	59.0323	36.682	73
PAMsh:CED-10(G12V)	13.0435	60.8696	26.087	69
Figure 5E
Genotype Score	% animals with 10+ Puncta	% animals with 1-9 Puncta	% animals with 0 Puncta	N (animals)
WT	64.3275	31.5789	4.09357	171
psr-1(tm469)	28.4768	62.9139	8.60927	151
ced-10(n3246)	0.806452	49.1936	50	124
psr-1(tm469);ced-10(n3246)	0	17.5676	82.4324	74
PAMsh:CED-10;psr-1	74	24	2	100
ced-12(k149)	8.19672	68.8525	22.9508	61
ced-12(k149);ced-10(n3246)	1.69491	32.2034	66.1017	59
Figure 5 - supplement 1A
Genotype Score	% animals with 10+ Puncta	% animals with 1-9 Puncta	% animals with 0 Puncta	N (animals)
WT	64.3275	31.5789	4.09357	171
wsp-1(gm324)	3.1746	50.7936	46.0318	63
PAMsh:WSP-1	95.8333	4.16667	0	24
[truncated: 34 more columns]
