# Supplementary material for: Glia actively sculpt sensory neurons by controlled phagocytosis to tune animal behavior
Source: eLife. 2021 Mar 24;10:e63532. doi: 10.7554/eLife.63532 (PMC8079151; doi:10.7554/eLife.63532)
Supplement: Figure 6—source data 1. — Raw data for Figure 6B–D, F. NRE: neuron-receptive ending. [file elife-63532-fig6-data1.xlsx]

## Sheet: Figure 6
Figure 6B
Genotype Score	N (animals)	Avg	SE		Raw data (puncta/AMsh glia/animal)	Animal 1	Animal 2	Animal 3	Animal 4	Animal 5	Animal 6	Animal 7	Animal 8	Animal 9	Animal 10	Animal 11	Animal 12	Animal 13	Animal 14	Animal 15	Animal 16	Animal 17	Animal 18	Animal 19	Animal 20	Animal 21	Animal 22	Animal 23	Animal 24	Animal 25	Animal 26	Animal 27	Animal 28	Animal 29	Animal 30	Animal 31	Animal 32	Animal 33	Animal 34	Animal 35	Animal 36	Animal 37	Animal 38	Animal 39	Animal 40	Animal 41	Animal 42	Animal 43	Animal 44
WT	78	14.1923	0.95835			23	16	10	9	16	17	7	4	9	15	4	14	8	35	13	13	29	13	27	11	10	10	9	6	29	21	10	17	13	12	24	25	5	10	4	12	14	24	10	13	33	20	15	34
pde-1(nj57);pde-5(nj49)	16	7.125	1.40794			8	5	7	0	11	5	13	13	14	15	3	15	1	3	0	1
tax-4(p678);cng-3(jh113)	17	23.8235	2.38906			16	24	20	32	17	26	17	40	15	15	25	41	15	14	33	15	40
tax-2(p691)	37	28.1351	1.9812			18	9	17	26	29	45	29	22	15	40	45	15	39	33	46	26	31	31	23	22	19	27	35	26	42	21	68	27	20	26	24	14	16	37	44	15	19
ced-10(n3246);tax-2(p691)	25	1.76	0.455631			3	0	0	0	2	8	2	0	1	6	2	0	0	6	0	1	1	5	3	2	0	2	0	0	0
Figure 6C
Genotype Score	% animals with 10+ Puncta	% animals with 1-9 Puncta	% animals with 0 Puncta	N (animals)
WT	64.3275	31.5789	4.09357	171
pde-1(nj57);pde-5(nj49)	39.0625	59.375	1.5625	64
tax-4(p678);cng-3(jh113)	75.4717	24.5283	0	53
tax-2(p691)	98.913	1.08696	0	92
ced-10(n3246);tax-2(p691)	0	62.7119	37.2881	59
tax-2(p691); psr-1(tm469)	88.4615	11.5385	0	74
Figure 6D
Genotype Score	RNAi	% animals with 10+ Puncta	% animals with 1-9 Puncta	% animals with 0 Puncta	N (animals)
WT	empty vector	36.2832	55.7522	7.9646	113
WT	pat-2	10.9375	73.4375	15.625	128
tax-2(p691)	empty vector	90.9091	9.09091	0	33
tax-2(p691)	pat-2	62.8571	37.1429	0	35
tax-2(p691); psr-1(tm469)	empty vector	73.5294	26.4706	0	34
tax-2(p691); psr-1(tm469)	pat-2	44.4444	47.2222	8.33333	36
Figure 6F
Genotype Score	% puncta on mock	N (animals)	% puncta on Histamine	N (animals)
nsEx5266	36.9863	73	74.4681	47
nsEx5340	33.9449	109	71.2329	73
Total WT (control) score	35.4656	182	72.8505	120
ced-10(n3246); nsEx5266	9.52381	42	22.9167	48
[truncated: 34 more columns]
