# Supplementary material for: Glia actively sculpt sensory neurons by controlled phagocytosis to tune animal behavior
Source: eLife. 2021 Mar 24;10:e63532. doi: 10.7554/eLife.63532 (PMC8079151; doi:10.7554/eLife.63532)
Supplement: Figure 7—source data 1. — Raw data for Figure 7B–F and Figure 7—figure supplement 1B– D. NRE: neuron-receptive ending. [file elife-63532-fig7-data1.xlsx]

## Sheet: Figure 7
Figure 7B	AFD shape
Genotype Score	% Long	% Short	% Absent	% Normal	N (animals)
WT Day 1	1.44928	0	0	98.5507	69
WT Day 3	10.2564	1.28205	1.28205	87.1795	78
ced-10 Day 1	12	18	0	70	50
ced-10 Day 3	52.6316	5.26316	7.01754	35.0877	57
PAMsh:CED-10 Day 1	10.2041	57.1429	16.3265	16.3265	49
PAMsh:CED-10 Day 3	10	66	22	2	50
Figure 7C
15oC	% in Bin:	1	2	3	4	5	6	N
N2	TOTAL	50.8044	34.7226	8.92955	2.99617	1.68253	0.864716	539
	Trial 1	65.5502	26.3158	4.30622	0	1.91388	1.91388	209
	Trial 2	38.7755	37.415	14.2857	6.80272	2.04082	0.680272	147
	Trial 3	48.0874	40.4372	8.19672	2.18579	1.0929	0	183
	STDEV	11.0983	6.07123	4.10693	2.8357	0.420142	0.792147
	SQRT N	23.2164	23.2164	23.2164	23.2164	23.2164	23.2164
	SEM	0.478037	0.261506	0.176898	0.122142	0.0180968	0.0341202
ced-10	TOTAL	62.5	15.9794	7.34536	6.18557	4.63918	3.35052	776
	Trial 1	55.4717	14.717	10.9434	7.92453	6.79245	4.15094	265
	Trial 2	80.3922	9.80392	4.57516	3.26797	1.96078	0	153
	Trial 3	43.1579	27.3684	7.36842	7.89474	6.31579	7.89474	190
	Trial 4	79.1667	10.7143	4.16667	4.16667	1.78571	0	168
	STDEV	15.8746	7.01456	2.72217	2.12665	2.35501	3.29297
	SQRT N	27.8568	27.8568	27.8568	27.8568	27.8568	27.8568
	SEM	0.569865	0.251808	0.0977201	0.0763422	0.08454	0.118211
Figure 7D
25oC	%	1	2	3	4	5	6	N
N2	TOTAL	3.68359	2.42767	3.72446	13.1654	38.2686	38.7304	480
	Trial 1	0	1.81818	2.72727	4.54545	38.1818	52.7273	110
	Trial 2	5	1.66667	1.66667	15	40	36.6667	60
	Trial 3	8.13008	5.69106	5.69106	17.0732	21.9512	41.4634	123
	Trial 4	1.60428	0.534759	4.81283	16.0428	52.9412	24.0642	187
	STDEV	3.62384	2.2497	1.85121	5.80859	12.7089	11.8707
	SQRT N	21.9089	22	22	22	22	22
	SEM	0.165405	0.102259	0.084146	0.264027	0.577676	0.539576
ced-10	TOTAL	16.8638	15.4395	25.0351	29.979	10.2729	2.40971	917
	Trial 1	0	6.25	18.75	65.625	9.375	0	32
	Trial 2	5.55556	9.25926	25.9259	48.1481	9.25926	1.85185	54
	Trial 3	5	13	25	36	18	3	100
	Trial 4	6.66667	11.4286	30.4762	32.381	19.0476	0	105
	Trial 5	32.0175	24.1228	23.2456	10.5263	7.01754	3.07018	228
	Trial 6	29.927	21.8978	20.438	16.7883	6.56934	4.37956	137
	Trial 7	35.2518	18.705	30.2158	11.5108	1.43885	2.8777	139
	Trial 8	20.4918	18.8525	26.2295	18.8525	11.4754	4.09836	122
	STDEV	15.2398	6.71801	4.48841	20.4881	6.33357	1.65334
	SQRT N	30.282	30.282	30.282	30.282	30.282	30.282
	SEM	0.503264	0.221848	0.14822	0.676576	0.209153	0.0545981
Figure 7E
15oC	%	1	2	3	4	5	6	N
N2	Combined	48.0263	33.0592	12.3355	2.63158	1.64474	2.30263	608
	Trial 1	44.697	37.8788	7.57576	4.54545	1.51515	3.78788	132
	Trial 2	34.2857	22.8571	28.5714	3.80952	6.66667	3.80952	105
	Trial 3	75.2	18.4	5.6	0.8	0	0	125
	Trial 4	41.8699	42.2764	11.3821	2.03252	0.406504	2.03252	246
	STDEV	18.0028	11.5162	10.4714	1.6985	3.08034	1.80811
	SQRT N	6.9301	5.74971	3.5122	1.62221	1.28247	1.51744
	SEM	2.59777	2.00291	2.98144	1.04703	2.40188	1.19155
pAMsh:CED-10 #1	Combined	16.1235	20.4117	26.072	12.1784	11.6638	13.5506	583
	Trial 1	30.7692	17.9487	17.9487	2.5641	17.9487	12.8205	39
	Trial 2	5.06329	10.1266	26.5823	18.9873	14.7679	24.4726	237
	Trial 3	25.1366	26.776	25.1366	7.10383	8.74317	7.10383	183
	Trial 4	19.3548	31.4516	29.0323	9.67742	8.06452	2.41935	124
	STDEV	11.0432	9.46597	4.76373	6.92488	4.78061	9.51576
	SQRT N	4.01541	4.51793	5.10608	3.48975	3.41523	3.68111
	SEM	2.7502	2.0952	0.932953	1.98435	1.39979	2.58502
pAMsh:CED-10 #2	Combined	15.7791	27.0217	30.9665	9.46746	7.88955	8.87574	507
	Trial 1	21.6216	51.3514	24.3243	2.7027	0	0	37
	Trial 2	24.5161	27.0968	23.871	7.09677	9.67742	7.74194	155
	Trial 3	15.508	24.5989	33.6898	10.1604	7.48663	8.55615	187
	Trial 4	3.90625	23.4375	37.5	13.2812	8.59375	13.2812	128
	STDEV	9.12918	13.2418	6.82028	4.51114	4.38515	5.50159
	SQRT N	3.97229	5.19824	5.56475	3.07692	2.80883	2.97922
	SEM	2.29822	2.54736	1.22562	1.46612	1.5612	1.84666
Figure 7F
25oC	% in Bin:	1	2	3	4	5	6	N
N2	Combined	12.3675	9.71731	7.24382	14.311	15.0177	41.3428	566
	Trial 1	3.87597	8.52713	10.0775	13.9535	16.2791	47.2868	129
	Trial 2	13.4021	10.3093	9.27835	16.4948	13.4021	37.1134	97
	Trial 3	10.6383	7.0922	4.25532	16.3121	15.6028	46.0993	141
	Trial 4	18.593	12.0603	6.53266	12.0603	14.5729	36.1809	199
	STDEV	6.13002	2.1567	2.66237	2.10914	1.25567	5.83267
	SQRT N	3.51674	3.11726	2.69143	3.78298	3.87526	6.42983
	SEM	1.7431	0.691856	0.989202	0.557533	0.324023	0.907126
pAMsh:CED-10 #1	Combined	14.507	9.71831	12.9577	25.0704	16.1972	21.5493	710
	Trial 1	18.1319	11.5385	13.1868	22.5275	14.2857	20.3297	182
	Trial 2	13.8614	9.24092	12.8713	26.7327	14.8515	22.4422	303
	Trial 3	11.6667	6.66667	8.88889	23.8889	23.3333	25.5556	180
	Trial 4	15.5556	17.7778	28.8889	28.8889	4.44444	4.44444	45
	STDEV	2.73075	4.75135	8.83907	2.85396	7.72479	9.41367
	SQRT N	3.80881	3.11742	3.59969	5.00704	4.02457	4.64212
	SEM	0.716955	1.52413	2.45551	0.56999	1.91941	2.02788
pAMsh:CED-10 #2	Combined	15.9041	16.9935	22.4401	25.4902	12.854	6.31808	459
	Trial 1	20.4082	23.1293	24.4898	14.966	8.16327	8.84354	147
	Trial 2	3.44828	13.7931	20.6897	48.2759	13.7931	0	29
	Trial 3	18.0412	14.9485	21.134	27.3196	12.8866	5.6701	194
	Trial 4	7.86517	12.3596	22.4719	31.4607	20.2247	5.61798	89
	STDEV	8.09621	4.83191	1.70631	13.7638	4.96252	3.67874
	SQRT N	3.988	4.12231	4.7371	5.04878	3.58525	2.51358
	SEM	2.03014	1.17213	0.360202	2.72616	1.38415	1.46355
Figure 7- supplement 1B	AFD shape
Genotype Score	% Long	% Short	% Absent	% Normal	N (animals)
WT Day 1	1.44928	0	0	98.5507	69
WT Day 3	10.2564	1.28205	1.28205	87.1795	78
CED-10(G12V) Day 1	35.9375	18.75	9.375	25	64
CED-10(G12V) Day 3	10.1695	55.9322	13.5593	11.8644	59
CED-10(T17N) 1E2 Day 1	45.8333	4.16667	0	50	24
CED-10(T17N) 1B1 Day 1	71.4286	0	0	28.5714	7
CED-10(T17N) 1E4 Day 1	34.7826	0	4.34783	60.8696	23
CED-10(T17N) Day 1 TOTAL	44.4444	1.85185	1.85185	51.8519	54
ttx-1(p767)	0	0	100	0	35
Figure 7- supplement 1C
15oC	% in Bin:	1	2	3	4	5	6	N
tax-2	Combined	15.6208	26.0121	23.0432	18.5223	8.63698	8.16464	153
	Trial 1	12.8205	23.0769	15.3846	25.641	10.2564	12.8205
	Trial 2	18.4211	28.9474	30.7018	11.4035	7.01754	3.50877
	STDEV	2.80027	2.93522	7.65857	7.11876	1.61943	4.65587
	SQRT N	12.3693	12.3693	12.3693	12.3693	12.3693	12.3693
	SEM	0.226388	0.237299	0.619159	0.575518	0.130923	0.376405
tax-2; tax-4	Combined	28	19	15	11	12	5	208
	Trial 1	38	19	15	11	12	5	208
Figure 7 - supplement 1D
25oC	% in Bin:	1	2	3	4	5	6	N
tax-2 at 25	Combined	6.97211	11.3546	12.8397	22.85	24.7846	21.199	442
	Trial 1	13.9442	22.7092	19.9203	19.5219	15.5378	8.36653	251
	Trial 2	0	0	5.75916	26.178	34.0314	34.0314	191
	STDEV	6.97211	11.3546	7.08058	3.32805	9.24678	12.8324
	SQRT N	21.0238	21.0238	21.0238	21	21	21
	SEM	0.33163	0.540082	0.336789	0.158479	0.440323	0.611069
tax-4 at 25	Combined	14.7319	15.7561	13.8032	19.7056	18.8201	17.1831	702
	Trial 1	16.8605	18.0233	15.1163	20.9302	16.8605	12.2093	172
	Trial 2	15.8273	16.5468	14.3885	18.3453	16.1871	18.705	278
	Trial 3	11.5079	12.6984	11.9048	19.8413	23.4127	20.6349	252
	STDEV	2.31838	2.24459	1.37487	1.05964	3.25909	3.60417
	SQRT N	26.4953	26.4953	26.4953	26.4953	26.4953	26.4953
	SEM	0.0875018	0.0847167	0.0518911	0.0399934	0.123007	0.13603
tax-2; tax-4 at 25	Combined	7.1377	13.1078	27.4535	25.4092	17.2745	9.61724	439
	Trial 1	11.2903	11.2903	19.086	20.9677	19.6237	17.7419	372
	Trial 2	2.98507	14.9254	35.8209	29.8507	14.9254	1.49254	67
	STDEV	4.15262	1.81753	8.36744	4.4415	2.34914	8.1247
	SQRT N	20.9523	20.9523	20.9523	20.9523	20.9523	20.9523
	SEM	0.198194	0.0867457	0.399356	0.211981	0.112118	0.387771
